# Supplementary material for: Synthesis, mechanism and efficient modulation of a fluorescence dye by photochromic pyrazolone with energy transfer in the crystalline state
Source: Royal Society of Chemistry journal article supplement (doi:10.1039/c6ra27937f), 2017-01-01
Supplement: c6ra27937f1.pdf [file c6ra27937f1.pdf]

# Synthesis, mechanism and efficient modulation of fluorescence dye by photochromic pyrazolone with energy transfer in crystalline state

Yinhua Li, Jixi Guo,\* Anjie Liu, Dianzeng Jia,\* Xueyan Wu, and Yi Chen

*Key laboratory of energy materials chemistry, ministry of education; Key laboratory  
of advanced functional materials, autonomous region; Institute of Applied Chemistry,*

*Xinjiang University, Urumqi 830046, Xinjiang, P. R. China*

*Corresponding author: Tel.: +86-991-8583083; Fax: +86-991-8588883;  
E-mail address: [jxguo1012@163.com](mailto:jxguo1012@163.com); [jdz0991@gmail.com](mailto:jdz0991@gmail.com)*

## Table of Contents

|                                                          |    |
|----------------------------------------------------------|----|
| Molecular structure characterization data.....           | S1 |
| Kinetics plot of compound <b>1</b> .....                 | S2 |
| The crystal structure and data of <b>1</b> .....         | S2 |
| The volume optimization of reprecipitates <b>1</b> ..... | S3 |
| The isomers of <i>K</i> -form.....                       | S5 |
| The calculated UV-Vis analysis .....                     | S5 |
| The SEM spectra of reprecipitates <b>DPA</b> .....       | S7 |
| Fluorescence decay curves for <b>TCCM</b> .....          | S7 |
| Reference .....                                          | S8 |

## Molecular structure characterization data

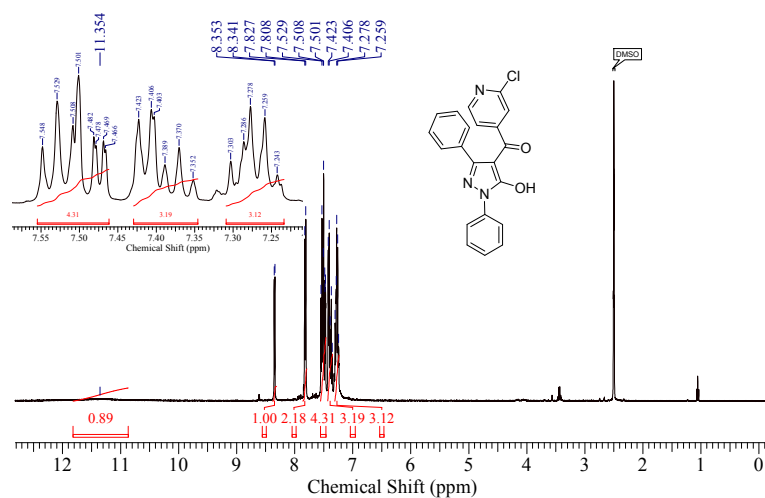

Figure S1.  $^1\text{H}$  NMR of DP3Cl4PyBP (400 MHz,  $\text{DMSO-}d_6$ ).

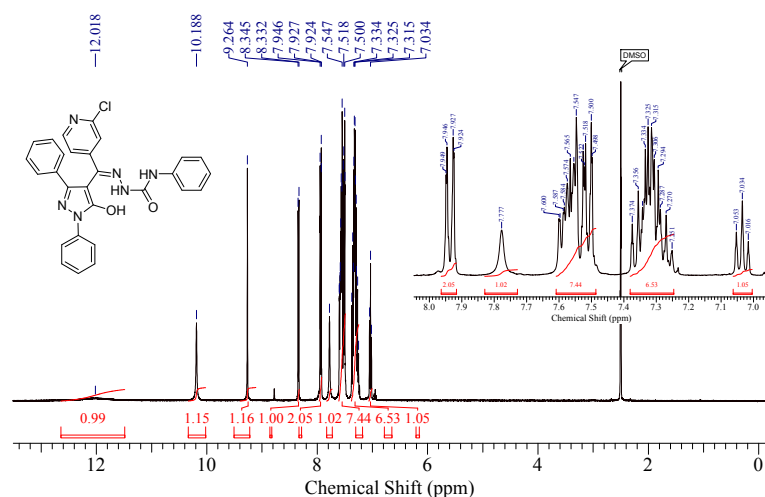

Figure S2.  $^1\text{H}$  NMR of 1 (400 MHz,  $\text{DMSO-}d_6$ ).

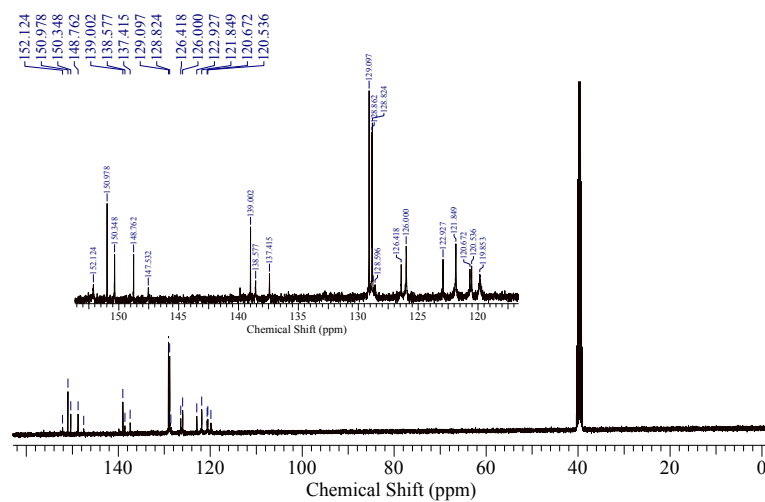

Figure S3.  $^{13}\text{C}$  NMR of 1 (120 MHz,  $\text{DMSO-}d_6$ ).

## Kinetics plot of compound 1

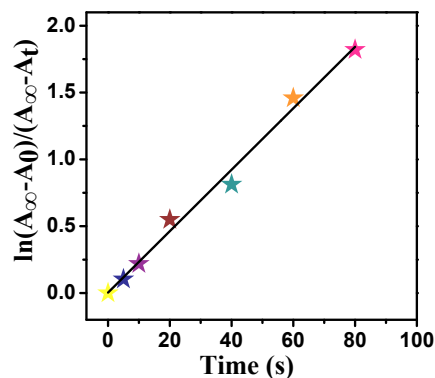

**Figure S4.** First-order kinetics plot of photocoloration reaction of photochromic **1** at 431 nm under the 365 nm light irradiation.

## The crystal structure and data of 1

**Table S1.** Crystal data and structure refinement for **1**

| <b>1</b>                        |                                                                                                                                          |
|---------------------------------|------------------------------------------------------------------------------------------------------------------------------------------|
| Empirical formula               | $C_{31}H_{31}ClN_6O_4$                                                                                                                   |
| Formula weight                  | 587.07                                                                                                                                   |
| Temperature                     | 298(2) K                                                                                                                                 |
| Wavelength                      | 0.71073 Å                                                                                                                                |
| Crystal system                  | Triclinic                                                                                                                                |
| space group                     | $P\bar{1}$                                                                                                                               |
| Unit cell dimensions            | $a = 11.500(6)$ Å $\alpha = 69.738(8)$ deg.<br>$b = 12.190(7)$ Å $\beta = 70.732(8)$ deg.<br>$c = 12.237(6)$ Å $\gamma = 70.189(8)$ deg. |
| Volume                          | 1469.5(13) Å <sup>3</sup>                                                                                                                |
| Z, Calculated density           | 2, 1.327 Mg/m <sup>3</sup>                                                                                                               |
| Absorption coefficient          | 0.177 mm <sup>-1</sup>                                                                                                                   |
| F(000)                          | 616                                                                                                                                      |
| Crystal size                    | 0.50 x 0.30 x 0.20 mm                                                                                                                    |
| Theta range for data collection | 2.28 to 24.99                                                                                                                            |
| Limiting indices                | $-11 \leq h \leq 13$ , $-13 \leq k \leq 14$ , $-11 \leq l \leq 14$                                                                       |
| Reflections collected / unique  | 7540 / 5082 [R(int) = 0.0330]                                                                                                            |
| Completeness to theta = 24.99   | 98.2 %                                                                                                                                   |

|                                      |                                             |
|--------------------------------------|---------------------------------------------|
| Absorption correction                | None                                        |
| Max. and min. transmission           | 0.9654 and 0.9167                           |
| Refinement method                    | Full-matrix least-squares on F <sup>2</sup> |
| Data / restraints / parameters       | 5082 / 6 / 394                              |
| Goodness-of-fit on F <sup>2</sup>    | 1.006                                       |
| Final R indices [ $I > 2\sigma(I)$ ] | $R_1 = 0.0664$ , $wR_2 = 0.1723$            |
| R indices (all data)                 | $R_1 = 0.1255$ , $wR_2 = 0.2084$            |
| Extinction coefficient               | 0.0036(19)                                  |
| Largest diff. peak and hole          | 0.249 and -0.275 e.Å <sup>-3</sup>          |

**Table S2.** Selected bond lengths (Å) for **1**

| <b>1</b>   |            |            |           |
|------------|------------|------------|-----------|
| O(1)-C(7)  | 1.325(4)   | N(2)-C(9)  | 1.340(4)  |
| O(1)-H(10) | 0.8201(11) | N(3)-C(16) | 1.296(4)  |
| O(2)-C(22) | 1.225(4)   | N(3)-N(4)  | 1.362(4)  |
| O(3)-C(29) | 1.415(8)   | N(4)-C(22) | 1.372(5)  |
| O(3)-H(30) | 0.8200     | N(4)-H(4N) | 0.863(10) |
| O(4)-C(31) | 1.555(9)   | N(5)-C(22) | 1.346(5)  |
| O(4)-H(40) | 0.8200     | N(5)-C(23) | 1.421(5)  |
| N(1)-N(2)  | 1.356(4)   | N(5)-H(5N) | 0.854(10) |
| N(1)-C(7)  | 1.372(4)   | N(6)-C(19) | 1.312(5)  |
| N(1)-C(6)  | 1.440(4)   | N(6)-C(20) | 1.340(5)  |

**Table S3.**Hydrogen bonds for **1**

| D-H...A                                           | d(D-H) (Å) | d(H...A) (Å) | d(D...A) (Å) | ∠(DHA)<br>(°) |
|---------------------------------------------------|------------|--------------|--------------|---------------|
| O(1)-H(10)...O(2)#1                               | 0.8201(11) | 1.80(3)      | 2.542(4)     | 149(7)        |
| O(3)-H(30)...O(4)                                 | 0.82       | 1.90         | 2.702(6)     | 167.2         |
| O(4)-H(40)...N(6)                                 | 0.82       | 2.09         | 2.904(6)     | 171.5         |
| N(4)-H(4N)...O(3)#2                               | 0.863(10)  | 2.24(2)      | 2.992(5)     | 146(3)        |
| N(5)-H(5N)...O(3)#2                               | 0.854(10)  | 2.051(16)    | 2.864(6)     | 159(3)        |
| Symmetry codes: #1 -x+2,-y+1,-z+1    #2 x+1,y,z-1 |            |              |              |               |

### The volume optimization of reprecipitates **1**

The stock solution of compound **1** (2.5 mM) in ethanol was prepared. The examination of PL

spectrum indicated that the emission intensity demonstrates weak change in lower volume ratio (<1.5). While the emission intensity sharply increases in emission maximum ( $\lambda_{em} = 465$ ), when volume ratios were changed from 1.5 to 2. In the mixture with “higher” volume ratio (>2), the intensity of PL maintains stable (Figure S5). So, reprecipitates **1** was prepared in mixed solvent with 67% volume fraction. With the continuation of aging time for 1h, 2h, 5h and 10h, the morphology of reprecipitates **1** vary from 0D nanoballs to 1D nanorods. The nanoballs are cohered, fused, rearranged and finally created the fully 1D nanorods as shown in figure S6. The driving force of growing is related to the decreasing of curvature strain and membrane defects, which can reduce the curvature energy and defects, and improve the stability for nanoballs.<sup>1,2</sup> The ethanol is an inevitable factor for fusion to provide the mobility for molecules. The bulk samples of reprecipitates **1** show size-dependent photochromic properties. The yellow nanoballs do not undergo photochromic reaction, while the white nanorods exhibit the photochromic reactions similarly with that of crystalline-state compound **1** (Figure S7). The distinction of properties is ascribed to morphologies, which is crucial for **1** to achieve fluorescence modulation in aggregated state.

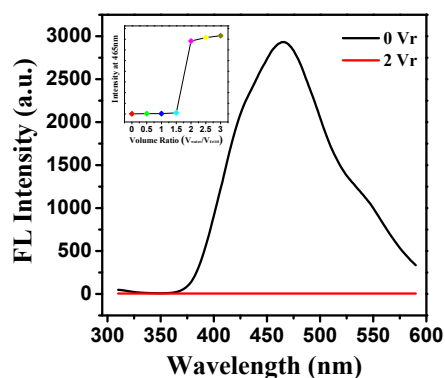

**Figure S5.** The fluorescence spectra of **1** in ethanol and in water-ethanol mixed solution with volume ratio 0 and 2. The insert: emission intensity of **1** at 465 nm with different volume ratio.

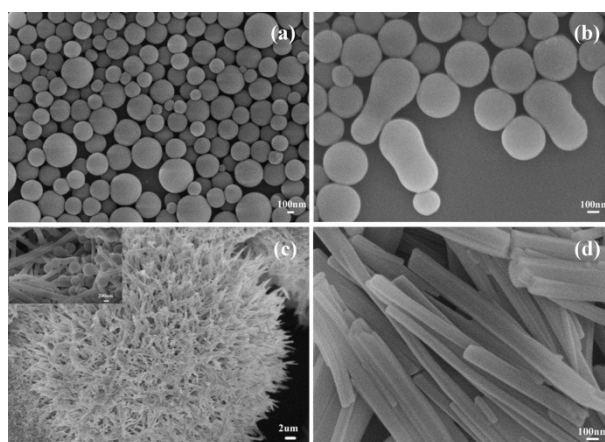

**Figure S6.** The SEM images of **1** aging for 1 h (a), 2 h (b), 5 h (c) and 10 h (d) in 67% water-ethanol mixed solution.

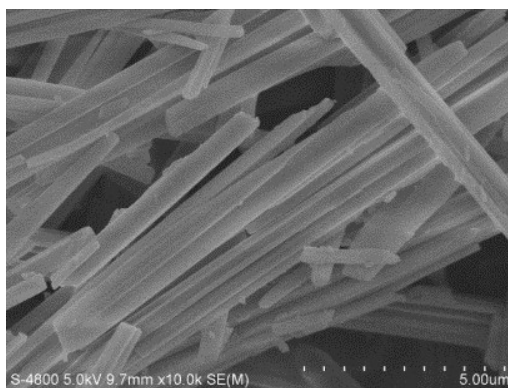

Figure S7. SEM spectra of crystalline state 1.

### The isomers of *K*-form

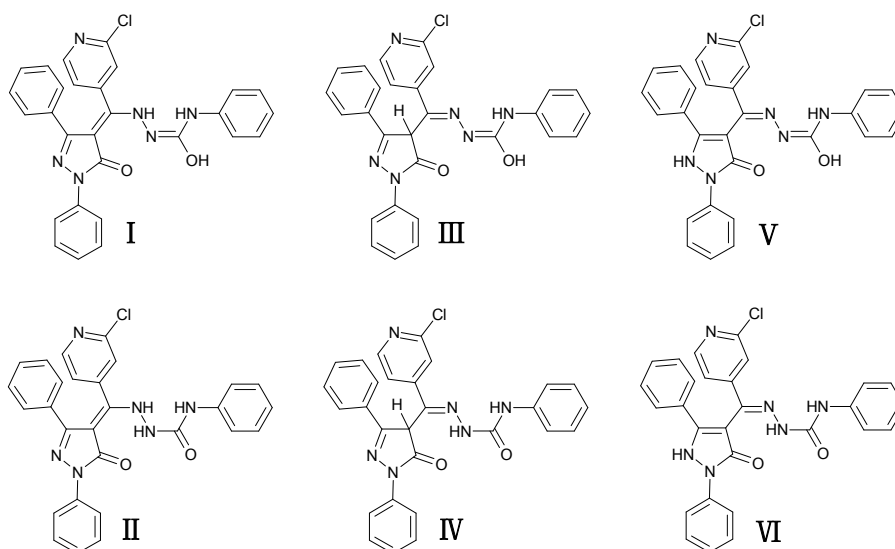

Figure S8. The six isomers of *K*-form.

### The calculated UV-Vis analysis

Table S4. Selected theoretical UV spectral characteristics of six isomers.

| Compound | Excited state | Excitation energy (eV) | $\lambda_{\text{abs}}$ (nm) | $f$        | MO composition        |       |
|----------|---------------|------------------------|-----------------------------|------------|-----------------------|-------|
| I        | S1            | 2.2696                 | 546.28                      | $f=0.0070$ | H-0 $\rightarrow$ L+0 | (99%) |
|          | S2            | 2.7400                 | 452.50                      | $f=0.0964$ | H-1 $\rightarrow$ L+0 | (98%) |
|          | S3            | 3.0769                 | 402.96                      | $f=0.0593$ | H-2 $\rightarrow$ L+0 | (94%) |
|          | S4            | 3.4851                 | 355.76                      | $f=0.0012$ | H-4 $\rightarrow$ L+0 | (12%) |

|     |    |        |        |          |                    |                |
|-----|----|--------|--------|----------|--------------------|----------------|
|     |    |        |        |          | H-3→L+0            | (94%)          |
| II  | S1 | 2.5642 | 483.53 | f=0.0088 | H-0→L+0            | (99%)          |
|     | S2 | 3.0765 | 403.00 | f=0.2314 | H-1→L+0            | (98%)          |
|     | S3 | 3.5053 | 353.70 | f=0.0627 | H-2→L+0            | (96%)          |
|     | S4 | 3.7298 | 332.42 | f=0.0046 | H-4→L+0<br>H-3→L+0 | (23%)<br>(74%) |
| III | S1 | 3.1801 | 389.88 | f=0.0063 | H-0→L+0            | (96%)          |
|     | S2 | 3.5253 | 351.70 | f=0.6317 | H-1→L+0            | (88%)          |
|     | S3 | 3.5570 | 348.56 | f=0.1446 | H-1→L+1            | (52%)          |
|     | S4 | 3.6280 | 341.74 | f=0.1575 | H-1→L+1<br>H-0→L+1 | (50%)<br>(45%) |
| IV  | S1 | 3.2260 | 384.33 | f=0.0024 | H-0→L+0            | (95%)          |
|     | S2 | 3.1135 | 360.05 | f=0.2087 | H-1→L+0            | (98%)          |
|     | S3 | 3.7492 | 330.70 | f=0.2402 | H-2→L+0<br>H-0→L+1 | (11%)<br>(85%) |
|     | S4 | 3.7819 | 327.83 | f=0.0353 | H-3→L+0            | (78%)          |
| V   | S1 | 3.1916 | 388.47 | f=0.4380 | H-0→L+0            | (87%)          |
|     | S2 | 3.3685 | 368.07 | f=0.0329 | H-1→L+0            | (89%)          |
|     | S3 | 3.4584 | 356.49 | f=0.1488 | H-0→L+1            | (79%)          |
| VI  | S1 | 2.9618 | 418.61 | f=0.1030 | H-0→L+0            | (97%)          |
|     | S2 | 3.4702 | 357.28 | f=0.0133 | H-1→L+0            | (86%)          |
|     | S3 | 3.6469 | 339.97 | f=0.3148 | H-0→L+1            | (87%)          |

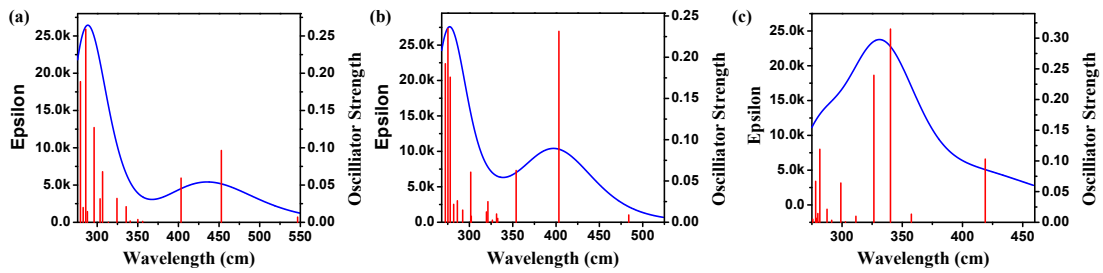

**Figure S9.** The theoretical absorption spectra with oscillator (a) I, (b) II, (c) VI.

## The SEM spectra of reprecipitates DPA

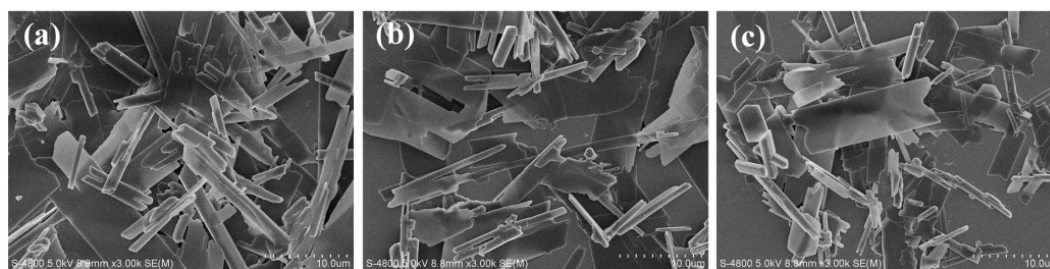

**Figure S10.** SEM spectra of reprecipitates **DPA** for aging 1 h (a), 5 h (b), 10 h (c) in 67% water-ethanol mixed solution.

## Fluorescence decay curves for TCCM

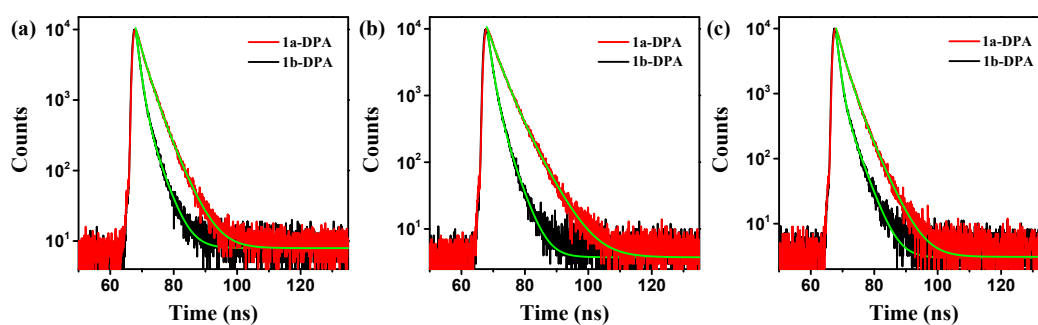

**Figure S11.** Emission decay profiles of different **TCCM** (a) 5%, (b) 15%, (c) 20%.

**Table S5.** The fluorescence modulation ratios, fitting average lifetimes and intermolecular energy transfer efficiency for **1** and **TCCM** materials before and after irradiation.

| Compound   | FM Ratio | Before irradiation | After irradiation | $E_T$ |
|------------|----------|--------------------|-------------------|-------|
|            |          | $\tau_{on}(ns)$    | $\tau_{off}(ns)$  |       |
| <b>1</b>   | -        | 1.89               | 1.87              | -     |
| <b>5%</b>  | 28%      | 3.20               | 1.77              | 45%   |
| <b>10%</b> | 21%      | 3.79               | 1.70              | 55%   |
| <b>15%</b> | 29%      | 3.76               | 1.84              | 51%   |
| <b>20%</b> | 31%      | 3.0                | 1.84              | 41%   |



## Reference

1. H. B. Fu and J. N. Yao, *J. Am. Chem. Soc.*, 2001, **123**, 1434-1439.
2. D. M. Vriezema, J. Hoogboom, K. Velonia, K. Takazawa, P. C. M. Christianen, J. C. Maan, A. E. Rowan and R. J. M. Nolte, *Angew. Chem. Int. Ed.*, 2003, **42**, 772-776.
